# Supplementary material
Source: PubMed Central journal article supplement (PMC4824278)
Supplement: NIHMS61870-supplement-2.pdf [file NIHMS61870-supplement-2.pdf]

**Supplementary Table 1. Origin and characteristics of *Staphylococcus aureus* strains sequenced in this study.**

| <b>Strain</b> | <b>Host</b> | <b>Geographic origin</b> | <b>Isolation date</b> | <b>Accession Number</b> |
|---------------|-------------|--------------------------|-----------------------|-------------------------|
| J             | Rabbit      | France                   | 2002                  | ERS400835               |
| I             | Rabbit      | Belgium                  | 1997                  | ERS400834               |
| DL190         | Rabbit      | Spain                    | 2003                  | ERS400836               |
| DV602         | Rabbit      | Italy                    | 2010                  | ERS400837               |
| DL688         | Rabbit      | Spain                    | 2007                  | ERS400838               |
| DL645         | Rabbit      | Spain                    | 2007                  | ERS400839               |
| A             | Human       | France                   | 1981                  | ERS400826               |
| B             | Human       | USA                      | 2001                  | ERS400827               |
| C             | Human       | Spain                    | 2002                  | ERS400828               |
| D             | Human       | Belgium                  | 2003                  | ERS400829               |
| E             | Human       | Lesser Antilles          | 2005                  | ERS400830               |
| F             | Human       | UK                       | 2007                  | ERS400831               |
| G             | Human       | India                    | 2009                  | ERS400832               |
| H             | Human       | Denmark                  | 1957                  | ERS400833               |

**Supplementary Table 2. Pseudogenes and genes specific to all rabbit *S. aureus* ST121 strains.**

| Annotation                                                      | Position in ED133 | Original sequence | New sequence     | % CDS affected | Skin model <sup>1</sup> |
|-----------------------------------------------------------------|-------------------|-------------------|------------------|----------------|-------------------------|
| EssB                                                            | 279142            | AAAATGAAATG       | A                | 97.5           | -                       |
| MatE                                                            | 381320            | TGGG              | TGG              | 42.9           | -                       |
| Histidinol-phosphate aminotransferase                           | 786424            | TC                | TCC              | 72.5           | -                       |
| Rot (repressor of toxins)                                       | 1849323           | T                 | TA               | 38.8           | +                       |
| Lipase precursor                                                | 319553            | CAG               | TAG <sup>2</sup> |                | -                       |
| Conserved hypothetical protein (NADH dehydrogenase superfamily) | 914456            | CAA               | TAA <sup>2</sup> |                | -                       |
| Aspartate kinase II                                             | 1444895           | CAA               | TAA <sup>2</sup> |                | -                       |
| Urease accessory protein                                        | 2375137           | TCA               | TGA <sup>2</sup> |                | -                       |
| Probable oxidoreductase                                         | 2413360           | GGA               | TGA <sup>2</sup> |                | -                       |
| $\beta$ -toxin gene ( <i>hIb</i> ) <sup>3</sup>                 |                   |                   |                  |                | -                       |
| Serine protease SplE <sup>4</sup>                               |                   |                   |                  |                | -                       |

<sup>1</sup>Role of the mutations in the infectivity of the human or rabbit clones in the skin model. (-): no effect; (+): changes in infectivity.

<sup>2</sup>Stop codon.

<sup>3</sup>Prophage insertion in the human ST121 strains.

<sup>4</sup>Gene located in vSa $\beta$ .

**Supplementary Table 3. Non-synonymous mutations identified in the rabbit ST121 strains.**

| Position in ED133 | CDS/intergenic | original codon | new codon | original AA | new AA | annotated CDS                                                          |
|-------------------|----------------|----------------|-----------|-------------|--------|------------------------------------------------------------------------|
| 11335             | CDS            | CCA            | CTA       | P           | L      | histidine ammonia-lyase                                                |
| 45510             | CDS            | GCA            | ACA       | A           | T      | conserved hypothetical protein                                         |
| 65511             | CDS            | GAT            | GAG       | D           | E      | Na/Pi cotransporter family protein                                     |
| 70555             | CDS            | GTT            | GCT       | V           | A      | L-lactate permease                                                     |
| 109775            | CDS            | ATG            | ATA       | M           | I      | 5' nucleotidase family protein                                         |
| 118223            | CDS            | GGT            | GAT       | G           | D      | capsular polysaccharide biosynthesis protein CapC                      |
| 138492            | CDS            | GAT            | GGT       | D           | G      | conserved hypothetical protein                                         |
| 140409            | CDS            | AGA            | AGT       | R           | S      | hypothetical protein                                                   |
| 140953            | CDS            | GTA            | GAA       | V           | E      | ABC transporter, permease protein                                      |
| 150450            | CDS            | CAT            | TAT       | H           | Y      | surfactin/siderophore synthetase                                       |
| 165057            | CDS            | CCT            | CTT       | P           | L      | hypothetical protein                                                   |
| 166637            | CDS            | GTA            | GCA       | V           | A      | glucokinase regulator-related protein                                  |
| 170974            | CDS            | CCC            | TCC       | P           | S      | type I restriction-modification enzyme, R subunit                      |
| 178367            | CDS            | AAG            | GAG       | K           | E      | Putative glutathione transporter, permease component                   |
| 184278            | CDS            | GAT            | AAT       | D           | N      | gamma-glutamyltranspeptidase                                           |
| 199620            | CDS            | CAG            | CGG       | Q           | R      | Two-component sensor histidine kinase family protein                   |
| 210606            | CDS            | CTC            | TTC       | L           | F      | acetyl-CoA acetyltransferase                                           |
| 213046            | CDS            | GTA            | GGA       | V           | G      | 3-hydroxyacyl-CoA dehydrogenase protein                                |
| 219237            | CDS            | AAA            | AGA       | K           | R      | hypothetical protein                                                   |
| 265897            | CDS            | TCC            | TTC       | S           | F      | Choloylglycine hydrolase family protein                                |
| 283750            | CDS            | AGT            | AAT       | S           | N      | virulence protein EssC                                                 |
| 306463            | CDS            | ACG            | GCG       | T           | A      | ABC transporter, ATP-binding protein                                   |
| 370183            | CDS            | GAT            | TAT       | D           | Y      | NADH-dependent flavin oxidoreductase                                   |
| 373801            | CDS            | GGC            | AGC       | G           | S      | hypothetical protein                                                   |
| 376156            | CDS            | TTC            | TTA       | F           | L      | transport protein, putative                                            |
| 394015            | CDS            | GCT            | GTT       | A           | V      | hypothetical protein                                                   |
| 396787            | CDS            | GTG            | TTG       | V           | L      | conserved hypothetical protein                                         |
| 401320            | CDS            | CGC            | TGC       | R           | C      | 5-methyltetrahydropteroyltriglutamate-- homocysteine methyltransferase |
| 408832            | CDS            | GTA            | ATA       | V           | I      | Chromosome partitioning protein ParB                                   |
| 432638            | CDS            | GCT            | GTT       | A           | V      | inosine-5'-monophosphate dehydrogenase                                 |
| 485848            | CDS            | GCG            | GAG       | A           | E      | hypothetical transmembrane protein                                     |
| 497132            | CDS            | AGC            | AAC       | S           | N      | LysM domain protein                                                    |
| 503355            | CDS            | CCT            | GCT       | P           | A      | glutamate synthase, large subunit                                      |
| 504891            | CDS            | CAT            | TAT       | H           | Y      | glutamate synthase, large subunit                                      |
| 539424            | CDS            | GAT            | AAT       | D           | N      | UDP-N-acetylglucosamine pyrophosphorylase                              |
| 572279            | CDS            | GGA            | AGA       | G           | R      | nucleoside permease NupC                                               |
| 586608            | CDS            | CCA            | CTA       | P           | L      | hypothetical protein                                                   |
| 586966            | CDS            | ATG            | ATC       | M           | I      | hypothetical protein                                                   |
| 592700            | CDS            | CCA            | TCA       | P           | S      | DNA-directed RNA polymerase, beta subunit                              |
| 599503            | CDS            | ACA            | ATA       | T           | I      | ribosomal L7Ae family protein                                          |
| 609241            | CDS            | ATT            | ACT       | I           | T      | L-ribulokinase, putative                                               |
| 617650            | CDS            | CGT            | CAT       | R           | H      | sdrC protein                                                           |
| 635689            | CDS            | TTC            | TTA       | F           | L      | 6-phospho-3-hexuloisomerase                                            |
| 650300            | CDS            | TCA            | TTA       | S           | L      | conserved hypothetical protein                                         |
| 654164            | CDS            | GAA            | CAA       | E           | Q      | Diphosphomevalonate decarboxylase                                      |
| 654861            | CDS            | ATA            | ACA       | I           | T      | Diphosphomevalonate decarboxylase                                      |
| 655484            | CDS            | GCG            | ACG       | A           | T      | phosphomevalonate kinase                                               |
| 656295            | CDS            | GAT            | GAG       | D           | E      | conserved hypothetical protein                                         |
| 675435            | CDS            | GGT            | GAT       | G           | D      | hydrolase                                                              |
| 678502            | CDS            | CAT            | TAT       | H           | Y      | probable esterase or lipase                                            |
| 689310            | CDS            | GCA            | GTA       | A           | V      | Na <sup>+</sup> /H <sup>+</sup> antiporter                             |
| 706375            | CDS            | CGT            | TGT       | R           | C      | nucleoside permease NupC, putative                                     |
| 719366            | CDS            | GAA            | aaa       | E           | K      | two-component response regulator                                       |

| Position in ED133 | CDS/intergenic | original codon | new codon | original AA | new AA | annotated CDS                                                             |
|-------------------|----------------|----------------|-----------|-------------|--------|---------------------------------------------------------------------------|
| 729917            | CDS            | ACT            | ATT       | T           | I      | transcriptional regulator, AraC family                                    |
| 730649            | CDS            | CTT            | CAT       | L           | H      | transcriptional regulator, AraC family                                    |
| 732738            | CDS            | GCG            | GTG       | A           | V      | conserved hypothetical protein                                            |
| 761891            | CDS            | CCT            | ACT       | P           | T      | N-acetylglucosamine-6-phosphate deacetylase                               |
| 813400            | CDS            | GTC            | GCC       | V           | A      | degV family protein                                                       |
| 833512            | CDS            | CAT            | CGT       | H           | R      | thioredoxin reductase                                                     |
| 837248            | CDS            | GCT            | GTT       | A           | V      | conserved hypothetical protein                                            |
| 839280            | CDS            | TGT            | CGT       | C           | R      | malate dehydrogenase                                                      |
| 847351            | CDS            | TTG            | atg       | L           | M      | phosphoglycerate kinase                                                   |
| 849950            | CDS            | GTC            | GCC       | V           | A      | enolase 2-phosphoglycerate dehydratase                                    |
| 850259            | CDS            | GGT            | GCT       | G           | A      | enolase 2-phosphoglycerate dehydratase                                    |
| 851714            | CDS            | GAT            | GGT       | D           | G      | probable membrane protein                                                 |
| 867101            | CDS            | GAT            | AAT       | D           | N      | staphylococcal thermonuclease precursor                                   |
| 885877            | CDS            | TAC            | CAC       | Y           | H      | conserved hypothetical protein                                            |
| 903320            | CDS            | ACA            | AAA       | T           | K      | D-alanine lipoteichoic acid and wall teichoic acid esterification protein |
| 903730            | CDS            | TAT            | CAT       | Y           | H      | D-alanine lipoteichoic acid and wall teichoic acid esterification protein |
| 904197            | CDS            | TAA            | TAT       | *           | Y      | D-alanine lipoteichoic acid and wall teichoic acid esterification protein |
| 914437            | CDS            | GGA            | GAA       | G           | E      | conserved hypothetical protein                                            |
| 929999            | CDS            | TTA            | ATA       | L           | I      | argininosuccinate lyase                                                   |
| 936781            | CDS            | GAT            | AAT       | D           | N      | ATP-dependent nuclease subunit B                                          |
| 937594            | CDS            | GAT            | AAT       | D           | N      | ATP-dependent nuclease subunit B                                          |
| 943586            | CDS            | GCT            | GTT       | A           | V      | fumarylacetoacetate hydrolase family protein                              |
| 943909            | CDS            | CGC            | TGC       | R           | C      | fumarylacetoacetate hydrolase family protein                              |
| 946614            | CDS            | GCG            | GTG       | A           | V      | probable hydrolase                                                        |
| 948776            | CDS            | CCA            | CTA       | P           | L      | Lipopolysaccharide modification acyltransferase                           |
| 951585            | CDS            | TCA            | TTA       | S           | L      | putative ATP-dependent protease protein                                   |
| 952545            | CDS            | TCT            | TTT       | S           | F      | putative ATP-dependent protease protein                                   |
| 964210            | CDS            | GCA            | GTA       | A           | V      | oligopeptide transport system ATP-binding protein                         |
| 964957            | CDS            | GTA            | Cta       | V           | L      | oligopeptide transport system ATP-binding protein                         |
| 965060            | CDS            | AAG            | ACG       | K           | T      | oligopeptide transport system ATP-binding protein                         |
| 966215            | CDS            | GAT            | GCT       | D           | A      | oligopeptide binding protein                                              |
| 968210            | CDS            | ACA            | GCA       | T           | A      | oligopeptide ABC transporter, oligopeptide-binding protein                |
| 972027            | CDS            | GAT            | TAT       | D           | Y      | oligopeptide ABC transporter, permease protein                            |
| 976389            | CDS            | CAA            | CCA       | Q           | P      | probable competence-related protein                                       |
| 981313            | CDS            | TCA            | TTA       | S           | L      | conserved hypothetical protein                                            |
| 1001904           | CDS            | ATG            | GTG       | M           | V      | Serine protease                                                           |
| 1016199           | CDS            | ACA            | ATA       | T           | I      | Heme ABC type transporter HtsABC, heme-binding protein                    |
| 1021920           | CDS            | GAG            | AAG       | E           | K      | probable hydrolase                                                        |
| 1036100           | CDS            | ATT            | TTT       | I           | F      | probable exported protein                                                 |
| 1063044           | CDS            | GTG            | GGG       | V           | G      | conserved hypothetical protein                                            |
| 1065279           | CDS            | GTA            | ATA       | V           | I      | phosphoenolpyruvate-protein phosphatase                                   |
| 1080147           | CDS            | TCA            | TTA       | S           | L      | Spermidine Putrescine transport ATP-binding protein potA                  |
| 1092356           | CDS            | CGT            | TGT       | R           | C      | conserved hypothetical protein                                            |
| 1102818           | CDS            | GAT            | AAT       | D           | N      | probable exported protein                                                 |
| 1180231           | CDS            | AGC            | AGA       | S           | R      | fibrinogen-binding protein                                                |
| 1183493           | CDS            | GAC            | GGC       | D           | G      | alpha-hemolysin precursor                                                 |
| 1207772           | CDS            | TTA            | TCA       | L           | S      | cell division protein                                                     |
| 1213204           | CDS            | GAT            | GTT       | D           | V      | hypothetical protein                                                      |
| 1231095           | CDS            | AAA            | AAT       | K           | N      | orotate phosphoribosyltransferase                                         |
| 1237125           | CDS            | GGT            | AGT       | G           | S      | primosomal protein                                                        |
| 1239905           | CDS            | ACA            | GCA       | T           | A      | hypothetical protein                                                      |
| 1244241           | CDS            | ATA            | ACA       | I           | T      | conserved hypothetical protein                                            |

| Position in ED133 | CDS/intergenic | original codon | new codon | original AA | new AA | annotated CDS                                                    |
|-------------------|----------------|----------------|-----------|-------------|--------|------------------------------------------------------------------|
| 1256899           | CDS            | GCT            | ACT       | A           | T      | fatty acid/phospholipid synthesis protein                        |
| 1261572           | CDS            | GAT            | AAT       | D           | N      | chromosome segregation SMC protein                               |
| 1271122           | CDS            | CGT            | TGT       | R           | C      | hypothetical protein                                             |
| 1285909           | CDS            | GAA            | GAC       | E           | D      | ATP-dependent protease ATP-binding subunit of heat shock protein |
| 1295264           | CDS            | GAG            | AAG       | E           | K      | prolyl-tRNA synthetase                                           |
| 1300223           | CDS            | ACA            | ATA       | T           | I      | DNA polymerase III, alpha subunit                                |
| 1302552           | CDS            | GAT            | GAA       | D           | E      | N utilization substance protein A, putative                      |
| 1310157           | CDS            | GAT            | AAT       | D           | N      | polyribonucleotide nucleotidyltransferase                        |
| 1317257           | CDS            | ATT            | ATG       | I           | M      | zinc protease                                                    |
| 1319722           | CDS            | GTG            | CTG       | V           | L      | acetoacetyl-CoA reductase, putative                              |
| 1341913           | CDS            | CCG            | TCG       | P           | S      | glycerol kinase                                                  |
| 1345777           | CDS            | GTT            | GCT       | V           | A      | tRNA delta(2)-isopentenylpyrophosphate transferase               |
| 1349126           | CDS            | ACG            | ATG       | T           | M      | aluminum resistance protein                                      |
| 1373590           | CDS            | GAT            | GAG       | D           | E      | threonine synthase                                               |
| 1395375           | CDS            | CAT            | TAT       | H           | Y      | aconitate hydratase                                              |
| 1416114           | CDS            | ACT            | ATT       | T           | I      | prephenate dehydrogenase                                         |
| 1422196           | CDS            | CAA            | CTA       | Q           | L      | indole-3-glycerol phosphate synthase                             |
| 1432102           | CDS            | GAT            | AAT       | D           | N      | probable oligopeptide membrane permease                          |
| 1447050           | CDS            | CCA            | TCA       | P           | S      | dihydrodipicolinate synthase                                     |
| 1450422           | CDS            | CTA            | GTA       | L           | V      | probable alanine racemase                                        |
| 1456935           | CDS            | CAA            | AAA       | Q           | K      | probable toxic ion resistance protein                            |
| 1462261           | CDS            | CTC            | TTC       | L           | F      | conserved hypothetical protein                                   |
| 1480187           | CDS            | TTA            | ATA       | L           | I      | conserved hypothetical protein                                   |
| 1480834           | CDS            | CAT            | CGT       | H           | R      | conserved hypothetical protein                                   |
| 1482778           | CDS            | GTA            | ATA       | V           | I      | probable membrane protein                                        |
| 1523689           | CDS            | CCA            | TCA       | P           | S      | probable membrane protein                                        |
| 1527206           | CDS            | AAT            | AGT       | N           | S      | conserved hypothetical protein                                   |
| 1544426           | CDS            | ATT            | CTT       | I           | L      | conserved hypothetical protein                                   |
| 1556783           | CDS            | GAC            | TAC       | D           | Y      | 30S ribosomal protein S1                                         |
| 1559039           | CDS            | ATC            | AAC       | I           | N      | L-asparaginase                                                   |
| 1562624           | CDS            | CGC            | TGC       | R           | C      | cell surface elastin binding protein                             |
| 1573416           | CDS            | ATG            | ATA       | M           | I      | site-specific recombinase                                        |
| 1584325           | CDS            | CCT            | TCT       | P           | S      | maltose operon repressor                                         |
| 1597515           | CDS            | TTG            | GTG       | L           | V      | Arginine pathway regulatory protein ArgR                         |
| 1608787           | CDS            | GGT            | GAT       | G           | D      | glycine dehydrogenase subunit 2                                  |
| 1615420           | CDS            | GAT            | TAT       | D           | Y      | Late competence protein, putative                                |
| 1616237           | CDS            | AAT            | GAT       | N           | D      | probable late competence protein                                 |
| 1624452           | CDS            | GAT            | GTT       | D           | V      | zinc-specific metalloregulator                                   |
| 1637719           | CDS            | GGT            | gcT       | G           | A      | probable recombination protein                                   |
| 1643482           | CDS            | ATT            | TTT       | I           | F      | probable membrane protein                                        |
| 1647581           | CDS            | GGA            | GAA       | G           | E      | probable methyltransferase                                       |
| 1655981           | CDS            | ATT            | ACT       | I           | T      | GTP binding protein protein                                      |
| 1656757           | CDS            | GCT            | GTT       | A           | V      | conserved hypothetical protein                                   |
| 1661261           | CDS            | ACA            | ATA       | T           | I      | conserved hypothetical protein                                   |
| 1682767           | CDS            | GGC            | AGC       | G           | S      | alanyl-tRNA synthetase                                           |
| 1688662           | CDS            | GAC            | AAC       | D           | N      | 5-methylaminomethyl-2-thiouridylate-methyltransferase tRNA       |
| 1701330           | CDS            | TTC            | CTC       | F           | L      | GTP pyrophosphokinase                                            |
| 1710165           | CDS            | GGC            | TGC       | G           | C      | queuine tRNA-ribosyltransferase                                  |
| 1716935           | CDS            | GAC            | ggc       | D           | G      | probable membrane protein                                        |
| 1725221           | CDS            | CTT            | TTT       | L           | F      | valyl-tRNA synthetase                                            |
| 1731787           | CDS            | CGT            | TGT       | R           | C      | Porphobilinogen deaminase                                        |
| 1737022           | CDS            | GAC            | GAG       | D           | E      | trigger factor prolyl isomerase                                  |
| 1741714           | CDS            | GTT            | GGT       | V           | G      | lysine specific permease                                         |
| 1742444           | CDS            | GGA            | AGA       | G           | R      | lysine specific permease                                         |

| Position in ED133 | CDS/intergenic | original codon | new codon | original AA | new AA | annotated CDS                                                                        |
|-------------------|----------------|----------------|-----------|-------------|--------|--------------------------------------------------------------------------------------|
| 1781264           | CDS            | CAT            | TAT       | H           | Y      | acetate kinase                                                                       |
| 1788714           | CDS            | GAT            | TAT       | D           | Y      | conserved hypothetical protein                                                       |
| 1803503           | CDS            | GAT            | GGT       | D           | G      | Cell surface receptor LsdH for hemoglobin-haptoglobin complexes                      |
| 1804318           | CDS            | AAG            | AAT       | K           | N      | Cell surface receptor LsdH for hemoglobin-haptoglobin complexes                      |
| 1808304           | CDS            | GGT            | AGT       | G           | S      | acetyl-CoA synthetase                                                                |
| 1821381           | CDS            | CAA            | CCA       | Q           | P      | SpolIII family cell division protein                                                 |
| 1821514           | CDS            | CCT            | TCT       | P           | S      | SpolIII family cell division protein                                                 |
| 1838939           | CDS            | GAT            | GGT       | D           | G      | cell wall surface anchor family protein                                              |
| 1855437           | CDS            | CCA            | CAA       | P           | Q      | riboflavin specific deaminase                                                        |
| 1880131           | CDS            | CCA            | TCA       | P           | S      | probable lipoprotein                                                                 |
| 1908851           | CDS            | AAT            | gat       | N           | D      | leukotoxin D subunit                                                                 |
| 1920198           | CDS            | GAT            | AAT       | D           | N      | signal transduction protein                                                          |
| 1925410           | CDS            | CAC            | TAC       | H           | Y      | probable peptidyl-prolyl cis-isomerase                                               |
| 1929559           | CDS            | ATC            | ACC       | I           | T      | conserved hypothetical protein                                                       |
| 1943526           | CDS            | TTA            | TTT       | L           | F      | glutamate ATP-binding ABC transporter                                                |
| 2024806           | CDS            | ACA            | ATA       | T           | I      | two-component response regulator                                                     |
| 2039791           | CDS            | GGC            | AGC       | G           | S      | glutamyl-tRNA amidotransferase subunit B                                             |
| 2048130           | CDS            | CCT            | CTT       | P           | L      | DNA ligase                                                                           |
| 2048649           | CDS            | GCA            | GTA       | A           | V      | DNA ligase                                                                           |
| 2051736           | CDS            | TCT            | TTT       | S           | F      | ATP-dependent DNA helicase                                                           |
| 2059268           | CDS            | CCA            | TCA       | P           | S      | nicotinate phosphoribosyltransferase                                                 |
| 2059610           | CDS            | CGT            | TGT       | R           | C      | nicotinate phosphoribosyltransferase                                                 |
| 2060995           | CDS            | CGT            | CTT       | R           | L      | probable nitric oxide synthase                                                       |
| 2084165           | CDS            | TTA            | ATA       | L           | I      | beta-hemolysin                                                                       |
| 2086394           | CDS            | GAA            | AAA       | E           | K      | probable leukocidin F subunit                                                        |
| 2088466           | CDS            | GTC            | GCC       | V           | A      | probable succinylidiaminopimelate desuccinylase                                      |
| 2090243           | CDS            | ATA            | ATG       | I           | M      | Permease of the drug/metabolite transporter (DMT) superfamily                        |
| 2110581           | CDS            | CGT            | TGT       | R           | C      | 60 kDa chaperonin protein                                                            |
| 2121935           | CDS            | GGT            | gct       | G           | A      | sucrose-6-phosphate hydrolase                                                        |
| 2134100           | CDS            | GCA            | GTA       | A           | V      | probable glycoprotein endopeptidase                                                  |
| 2134380           | CDS            | ACA            | GCA       | T           | A      | probable glycoprotein endopeptidase                                                  |
| 2142489           | CDS            | GTC            | ATC       | V           | I      | 3-isopropylmalate dehydrogenase                                                      |
| 2159939           | CDS            | GAT            | GGT       | D           | G      | alanine racemase 1                                                                   |
| 2162049           | CDS            | CAA            | GAA       | Q           | E      | probable membrane protein                                                            |
| 2164340           | CDS            | ACC            | GCT       | T           | A      | potassium-transporting ATPase C chain                                                |
| 2174923           | CDS            | GAT            | AAT       | D           | N      | UDP-N-acetylmuramoylalanyl-D-glutamyl-2, 6-diaminopimelate-D-alanyl-D-alanine ligase |
| 2186457           | CDS            | CCA            | TCA       | P           | S      | hypothetical protein                                                                 |
| 2215378           | CDS            | ATT            | ACT       | I           | T      | CTP synthase                                                                         |
| 2245709           | CDS            | GGC            | GAC       | G           | D      | glucosamine-fructose-6-phosphate aminotransferase                                    |
| 2247099           | CDS            | CAA            | AAA       | Q           | K      | glucosamine-fructose-6-phosphate aminotransferase                                    |
| 2249215           | CDS            | ACA            | AAA       | T           | K      | PTS system mannitol-specific IIBC component                                          |
| 2276085           | CDS            | GGA            | GTA       | G           | V      | probable hemolysin                                                                   |
| 2278165           | CDS            | TCG            | TGG       | S           | W      | probable membrane protein                                                            |
| 2282243           | CDS            | CAT            | TAT       | H           | Y      | ferrichrome ABC transporter                                                          |
| 2283319           | CDS            | AAA            | GAA       | K           | E      | ferrichrome ABC transporter lipoprotein                                              |
| 2300522           | CDS            | CGT            | TGT       | R           | C      | PTS system, lactose-specific IIA component                                           |
| 2315823           | CDS            | GCT            | GTT       | A           | V      | alpha-acetolactate synthase                                                          |
| 2325198           | CDS            | AAT            | GAT       | N           | D      | DNA-directed RNA polymerase alpha chain                                              |
| 2338068           | CDS            | AAG            | ATG       | K           | M      | 30S ribosomal protein S10                                                            |
| 2346432           | CDS            | TCC            | TTC       | S           | F      | conserved hypothetical protein                                                       |
| 2349214           | CDS            | ATT            | GTT       | I           | V      | multidrug efflux transporter                                                         |
| 2374530           | CDS            | GGT            | AGT       | G           | S      | urease alpha subunit                                                                 |
| 2384488           | CDS            | GCG            | ACG       | A           | T      | Na <sup>+</sup> /H <sup>+</sup> antiporter NhaC                                      |

| Position in ED133 | CDS/intergenic | original codon | new codon | original AA | new AA | annotated CDS                                                      |
|-------------------|----------------|----------------|-----------|-------------|--------|--------------------------------------------------------------------|
| 2395287           | CDS            | CCA            | TCA       | P           | S      | formate dehydrogenase alpha subunit                                |
| 2397406           | CDS            | TAC            | TGC       | Y           | C      | probable extragenic suppressor protein                             |
| 2404764           | CDS            | GAT            | AAT       | D           | N      | conserved hypothetical protein                                     |
| 2416509           | CDS            | GGA            | GAA       | G           | E      | imidazolonepropionase                                              |
| 2419255           | CDS            | GTT            | ATT       | V           | I      | LysR family regulatory protein                                     |
| 2424939           | CDS            | GCG            | GTG       | A           | V      | probable epimerase                                                 |
| 2429121           | CDS            | CGT            | CAT       | R           | H      | probable membrane protein                                          |
| 2431024           | CDS            | ACA            | CCA       | T           | P      | sodium/glutamate symporter                                         |
| 2442856           | CDS            | AGA            | AAA       | R           | K      | bicyclomycin and teicoplanin resistance protein                    |
| 2457670           | CDS            | TAT            | GAT       | Y           | D      | hypothetical protein                                               |
| 2468732           | CDS            | GTA            | ATA       | V           | I      | truncated conserved hypothetical protein                           |
| 2478422           | CDS            | CCA            | GCA       | P           | A      | nitrite extrusion protein                                          |
| 2478884           | CDS            | AAA            | AGA       | K           | R      | conserved hypothetical protein                                     |
| 2482344           | CDS            | TCT            | TGT       | S           | C      | two component sensor histidine kinase                              |
| 2485258           | CDS            | CAA            | CAC       | Q           | H      | nitrate reductase beta chain                                       |
| 2498449           | CDS            | GAT            | aAT       | D           | N      | probable zinc-binding lipoprotein                                  |
| 2502411           | CDS            | CAT            | CGT       | H           | R      | fmhA protein                                                       |
| 2510648           | CDS            | GTT            | GCT       | V           | A      | immunoglobulin G-binding protein                                   |
| 2528037           | CDS            | ACC            | AGC       | T           | S      | probable transporter protein                                       |
| 2540458           | CDS            | GCA            | ACA       | A           | T      | probable 2-dehydropantoate 2-reductase                             |
| 2544472           | CDS            | GAT            | AAT       | D           | N      | betaine-carnitine-choline ABC transporter                          |
| 2554534           | CDS            | GAG            | GAT       | E           | D      | ATP-binding ABC transporter                                        |
| 2564514           | CDS            | GAT            | GGT       | D           | G      | oligopeptide transporter putative membrane permease domain protein |
| 2638247           | CDS            | GTA            | GCA       | V           | A      | pyruvate oxidase                                                   |
| 2668994           | CDS            | GGA            | GAA       | G           | E      | probable phytoene dehydrogenase                                    |
| 2675690           | CDS            | GGT            | AGT       | G           | S      | probable membrane-embedded regulatory protein                      |
| 2683784           | CDS            | CCA            | CTA       | P           | L      | probable cobalmin synthesis protein                                |
| 2687285           | CDS            | TTC            | CTC       | F           | L      | hypothetical protein                                               |
| 2732696           | CDS            | GGC            | GAC       | G           | D      | alkaline phosphatase III precursor                                 |
| 2745714           | CDS            | GAC            | GAA       | D           | E      | zinc metalloproteinase aureolysin                                  |
| 2753259           | CDS            | CGT            | TGT       | R           | C      | mannose-6-phosphate isomerase                                      |
| 2764923           | CDS            | CAT            | TAT       | H           | Y      | conserved hypothetical protein                                     |
| 2776821           | CDS            | GAA            | AAA       | E           | K      | LPXTG cell wall surface anchor family protein                      |
| 2780361           | CDS            | CGC            | TGC       | R           | C      | LPXTG cell wall surface anchor family protein                      |
| 2817525           | CDS            | GTC            | GGC       | V           | G      | high-affinity nickel-transport protein                             |
| 2827683           | CDS            | GTT            | ATT       | V           | I      | glucose-inhibited division protein B                               |

**Supplementary Table 4. Mutant *S. aureus* strains analysed in this work.**

| Strain  | Previous name       | Description                                                      | Reference |
|---------|---------------------|------------------------------------------------------------------|-----------|
| J       | DV3 (JP3934)        | ST121 rabbit strain.                                             | (14)      |
| I       | KH119 (JP311)       | ST121 rabbit strain.                                             | (14)      |
| DL190   | DL190               | ST121 rabbit strain.                                             | This work |
| JP7966  | DV602               | ST121 rabbit strain.                                             | This work |
| DL688   | DL688               | ST121 rabbit strain.                                             | This work |
| DL645   | DL645               | ST121 rabbit strain.                                             | This work |
| A       | A4599 (JP7687)      | ST121 human strain.                                              | This work |
| B       | ST20070579 (JP7690) | ST121 human strain.                                              | This work |
| C       | HT20020235 (JP7692) | ST121 human strain.                                              | This work |
| D       | HT20030134 (JP7696) | ST121 human strain.                                              | This work |
| E       | HT20050331 (JP7700) | ST121 human strain.                                              | This work |
| F       | HT20070227 (JP7705) | ST121 human strain.                                              | This work |
| G       | ST20101201 (JP7707) | ST121 human strain.                                              | This work |
| H       | E269 (JP3929)       | ST121 human strain.                                              | This work |
| JP8795  |                     | J <i>essB</i> + ( <i>essB</i> <sup>h</sup> )                     | This work |
| JP8779  |                     | J <i>matE</i> + ( <i>matE</i> <sup>h</sup> )                     | This work |
| JP8796  |                     | J <i>histidinol</i> + ( <i>histidinol</i> <sup>h</sup> )         | This work |
| JP8348  |                     | J <i>rot</i> + ( <i>rot</i> <sup>h</sup> )                       | This work |
| JP8974  |                     | J <i>lipase</i> + ( <i>lipase</i> <sup>h</sup> )                 | This work |
| JP8780  |                     | J <i>NADH</i> + ( <i>NADH</i> <sup>h</sup> )                     | This work |
| JP8853  |                     | J <i>aspartate</i> + ( <i>aspartate</i> <sup>h</sup> )           | This work |
| JP8816  |                     | J <i>urease</i> + ( <i>urease</i> <sup>h</sup> )                 | This work |
| JP8750  |                     | J <i>oxidoreductase</i> + ( <i>oxidoreductase</i> <sup>h</sup> ) | This work |
| JP8613  |                     | J $\Delta$ <i>hlyB</i>                                           | This work |
| JP9548  |                     | J <i>dltB</i> <sup>h</sup>                                       | This work |
| JP8781  |                     | J $\Delta$ <i>rot</i>                                            | This work |
| JP9982  |                     | J $\Delta$ <i>dltB</i>                                           | This work |
| JP11398 |                     | J $\Delta$ <i>sp/E</i>                                           | This work |
| JP11125 |                     | I <i>essB</i> + ( <i>essB</i> <sup>h</sup> )                     | This work |
| JP11126 |                     | I <i>matE</i> + ( <i>matE</i> <sup>h</sup> )                     | This work |
| JP11127 |                     | I <i>histidinol</i> + ( <i>histidinol</i> <sup>h</sup> )         | This work |
| JP8350  |                     | I <i>rot</i> + ( <i>rot</i> <sup>h</sup> )                       | This work |
| JP11128 |                     | I <i>lipase</i> + ( <i>lipase</i> <sup>h</sup> )                 | This work |
| JP11129 |                     | I <i>NADH</i> + ( <i>NADH</i> <sup>h</sup> )                     | This work |
| JP11130 |                     | I <i>aspartate</i> + ( <i>aspartate</i> <sup>h</sup> )           | This work |
| JP11131 |                     | I <i>urease</i> + ( <i>urease</i> <sup>h</sup> )                 | This work |
| JP11132 |                     | I <i>oxidoreductase</i> + ( <i>oxidoreductase</i> <sup>h</sup> ) | This work |
| JP9014  |                     | I $\Delta$ <i>hlyB</i>                                           | This work |
| JP10035 |                     | I <i>dltB</i> <sup>h</sup>                                       | This work |



| Strain  | Previous name | Description                                               | Reference |
|---------|---------------|-----------------------------------------------------------|-----------|
| JP11400 |               | I $\Delta$ sp/E                                           | This work |
| JP11133 |               | F <i>essB</i> - ( <i>essB</i> <sup>r</sup> )              | This work |
| JP11134 |               | F <i>matE</i> - ( <i>matE</i> <sup>r</sup> )              | This work |
| JP11135 |               | F histidinol- ( <i>histidinol</i> <sup>r</sup> )          | This work |
| JP8569  |               | F <i>rot</i> - ( <i>rot</i> <sup>r</sup> )                | This work |
| JP11136 |               | F lipase- ( <i>lipase</i> <sup>r</sup> )                  | This work |
| JP11137 |               | F NADH- ( <i>NADH</i> <sup>r</sup> )                      | This work |
| JP11138 |               | F aspartate- ( <i>aspartate</i> <sup>r</sup> )            | This work |
| JP11139 |               | F urease- ( <i>urease</i> <sup>r</sup> )                  | This work |
| JP11140 |               | F oxidoreductase - ( <i>oxidoreductase</i> <sup>r</sup> ) | This work |
| JP10310 |               | F <i>dltB</i> <sup>r</sup>                                | This work |
| JP8897  |               | F $\Delta$ converting-phage ( <i>h1b</i> +)               | This work |
| JP10770 |               | F DltB T113K                                              | This work |
| JP10500 |               | F DltB Y260H                                              | This work |
| JP9692  |               | F DltB *405Y                                              | This work |
| JP10311 |               | F <i>dltB</i> <sup>r</sup> <i>rot</i> -                   | This work |
| JP11399 |               | JP10770 K113T                                             | This work |
| JP12370 |               | J <i>dltB</i> rabbit ST96                                 | This work |

**Supplementary Table 5. pMAD derivative plasmids used in this work.**

| Plasmid | Description                                                                                                                  | Reference |
|---------|------------------------------------------------------------------------------------------------------------------------------|-----------|
| pJP1486 | Restoration of the <i>essB</i> gene mutation ( <i>essB<sup>h</sup></i> )                                                     | This work |
| pJP1487 | Restoration of the <i>matE</i> gene mutation ( <i>matE<sup>h</sup></i> )                                                     | This work |
| pJP1488 | Restoration of the histidinol-phosphate aminotransferase gene mutation (histidinol-phosphate aminotransferase <sup>h</sup> ) | This work |
| pJP1478 | Restoration of the <i>rot</i> mutation ( <i>rot<sup>h</sup></i> )                                                            | This work |
| pJP1490 | Restoration of the lipase gene mutation (lipase <sup>h</sup> )                                                               | This work |
| pJP1483 | Restoration of the NADH dehydrogenase gene mutation (NADH <sup>h</sup> )                                                     | This work |
| pJP1485 | Restoration of the aspartate kinase gene mutation (aspartate kinase <sup>h</sup> )                                           | This work |
| pJP1489 | Restoration of the urease gene mutation (urease <sup>h</sup> )                                                               | This work |
| pJP1484 | Restoration of the oxidoreductase gene mutation (oxidoreductase <sup>h</sup> )                                               | This work |
| pJP5486 | Mutation of the <i>essB</i> gene ( <i>essB<sup>f</sup></i> )                                                                 | This work |
| pJP5487 | Mutation of the <i>matE</i> gene ( <i>matE<sup>f</sup></i> )                                                                 | This work |
| pJP5488 | Mutation of the histidinol-phosphate aminotransferase gene (histidinol-phosphate aminotransferase <sup>f</sup> )             | This work |
| pJP5490 | Mutation of the lipase gene (lipase <sup>f</sup> )                                                                           | This work |
| pJP5483 | Mutation of the NADH dehydrogenase gene (NADH <sup>f</sup> )                                                                 | This work |
| pJP5485 | Mutation of the aspartate kinase gene (aspartate kinase <sup>f</sup> )                                                       | This work |
| pJP5489 | Mutation of the urease gene (urease <sup>f</sup> )                                                                           | This work |
| pJP5484 | Mutation of the oxidoreductase gene (oxidoreductase <sup>f</sup> )                                                           | This work |
| pJP1482 | Deletion of <i>h/b</i> ( $\Delta h/b$ )                                                                                      | This work |
| pJP1492 | Introduction of the human <i>dltB</i> sequence in the rabbit clones (DltB <sup>h</sup> ; K113T, H250Y, Y405*)                | This work |
| pJP1480 | Introduction of the rabbit <i>rot</i> mutation in the human clones ( <i>rot<sup>f</sup></i> )                                | This work |
| pJP1496 | Introduction of the rabbit <i>dltB</i> sequence in the human clones (DltB <sup>f</sup> ; T113K, Y250H, *405Y)                | This work |
| pJP1481 | Restoration of human <i>h/b</i> mutation (phage deletion)                                                                    | This work |
| pJP1497 | Generation of DltB T113K                                                                                                     | This work |
| pJP1498 | Generation of DltB Y250H                                                                                                     | This work |
| pJP1493 | Generation of DltB *405Y                                                                                                     | This work |
| pJP1491 | Deletion of <i>rot</i>                                                                                                       | This work |
| pJP1495 | Deletion of <i>dltB</i>                                                                                                      | This work |
| pJP1494 | Generation of DltB Y405*                                                                                                     | This work |
| pJP1499 | Deletion of <i>sp/E</i>                                                                                                      | This work |
| pJP1500 | Introduction of the rabbit ST96 <i>dltB</i> sequence in the rabbit ST121 clones                                              | This work |

**Supplementary Table 6. Oligonucleotides used in this work.**

| Plasmid | Oligonucleotides   | SEQUENCE (5'-3')                                                    |
|---------|--------------------|---------------------------------------------------------------------|
| pJP1478 | Rot-1mB            | CGCGGATCCCTTGAAAAATAACCAATTTAGCC                                    |
|         | Rot-2c             | GTTCTTTTCATCGTCGACAGGACGCTCTTTTGTAATCCATTC                          |
|         | Rot-3m             | GAATGGATTTACTAAAGAGCGTCCTGTGCGACGATGAAAGAAC                         |
|         | Rot-4cE            | CCGGAATTTCGATTTAGCTTTGGAAAAATACACG                                  |
| pJP1480 | Rot-1mB            | CGCGGATCCCTTGAAAAATAACCAATTTAGCC                                    |
|         | Rot-5c             | GTTCTTTTCATCGTCGACAGGACGCTCTTT GTAAATCCATTC                         |
|         | Rot-6m             | GAATGGATTTAC AAAGAGCGTCCTGTGCGACGATGAAAGAAC                         |
|         | Rot-4cE            | CCGGAATTTCGATTTAGCTTTGGAAAAATACACG                                  |
| pJP1481 | h1b-1mB            | CGCGGATCCCAGTATATTTTCGCTTGCTTCG                                     |
|         | h1b-4cE            | GGAATTCGCCTGTAAGTGTGTCTGAAGG                                        |
| pJP1482 | h1b-1mB            | CGCGGATCCCAGTATATTTTCGCTTGCTTCG                                     |
|         | h1b-2c             | TTTACCATCATTATCACTCC                                                |
|         | h1b-3m             | GGAGTGATAATGATGGTGAAAAGATCATTACCCAATCAAAGCC                         |
|         | h1b-4cE            | GGAATTCGCCTGTAAGTGTGTCTGAAGG                                        |
| pJP1483 | NADH-1mBgIII       | GAAGATCTAAGCGGATTAACAACAGACCG                                       |
|         | NADH-2c            | CGTGAGGCATGGATCCTTTATGACGTTACGTTGTACAATGG                           |
|         | NADH-3m            | CCATTGTACAACGTGAACGTCATAAAGGATCCATGCCTCACG                          |
|         | NADH-4cE           | GGAATTCGTGAAACAGCATGTTTCATTAGG                                      |
| pJP1484 | oxidoreductase-1mB | CGCGGATCCCTAAGTTCTAGGAAGATTGGG                                      |
|         | oxidoreductase-2c  | GCTACACAGTTCACTCGAATTCCTTTTGGTCCTAATTC                              |
|         | oxidoreductase-3m  | GAATTAGGACCAAAGGAATTCGAGTGAAGTGTGTAGC                               |
|         | oxidoreductase-4cS | ACGCGTGCACATCAGTACTTCTACGGGCAGC                                     |
| pJP1485 | Aspartate-1mS      | ACGCGTGCACAGATTACTGTCTGCTAACAGC                                     |
|         | Aspartate-2c       | CACAAGGATTTTGATTACTAACAGCAAGTGCCACAGCGGTGATC<br>GGATCCACCTCTGCC     |
|         | Aspartate-3m       | GGCAGAGGTGGATCCGATACGACCGCTGTGGCACTTGCTGTTAGT<br>AATCAAATACCTTGTG   |
|         | Aspartate-4cE      | GGAATTCCTTTTCTACCGCTTGTGCCC                                         |
| pJP1486 | essB-1mB           | CGCGGATCCGCGGACTTAATATTGATGTGC                                      |
|         | essB-2c            | CCATCAGCGATTTGATAATCGATGAGTCGATCATTTTCAAC                           |
|         | essB-3m            | GTTGAAAATGATCGACTCATCGATTATCAAATCGCTGATGG                           |
|         | essB-4cE           | GGAATTCGTTGTCATACCGATAGCAACC                                        |
| pJP1487 | MatE-1mS           | ACGCGTGCACGTTGTTGTGTTGATTCAACGC                                     |
|         | MatE-2c            | GTGAATCCCATTAAGATACTCATTAAAAATGCAGGGATCCCTATTTT<br>AAAG             |
|         | MatE-3m            | CTTTAAAAATAGGGATCCCTGCATTTTAAATGAGTATCTTAATGGGATT<br>CAC            |
|         | MatE-4cE           | GGAATTCACCATAATCTACGCGACCACC                                        |
| pJP1488 | histidinol-1mB     | CGCGGATCCAACATCCAGAAATTAAGAAACCG                                    |
|         | histidinol-2c      | CTGCTCTAGAAATCATTAAATAAC                                            |
|         | histidinol-3m      | GTTATATTAATGATTTCTAGAGCAG                                           |
|         | histidinol-4cE     | GGAATTC AATTGTAATTCTAACACCAGTTGG                                    |
| pJP1489 | urease-1mB         | CGCGGATCCGTTCCGATTCACAGGCAATGG                                      |
|         | urease-2c          | GCTTTTGTCTTCTGAATTCGACAAATTGGCAATATTGCC                             |
|         | urease-3m          | GGCAATATTGCCAATTTGTGCAATTCAGAAAAACAAAAGC                            |
|         | urease-4cS         | ACGCGTGCACGATACCAAGCAATCCATGGGC                                     |
| pJP1490 | lipase-1mS         | ACGCGTGCACGTTGTTGTGTTGATTCAACGC                                     |
|         | lipase-2c          | CGTTGTGCGATTGGGATCCATTACGTTTCAGCATGACGGGTATTTTGA<br>ACCTGATCATTTTGG |
|         | lipase-3m          | CCAAAATGATCAGGTTCAAATACCCGTCATGCTGAACGTAATGGAT<br>CCCAATCGACAACG    |
|         | lipase-4cE         | GGAATTCACCATAATCTACGCGACCACC                                        |

| Plasmid | Oligonucleotides  | SEQUENCE (5'-3')                                                                |
|---------|-------------------|---------------------------------------------------------------------------------|
| pJP1491 | Rot-12mB          | CGCGGATCCACGATGGCTCATATTCATGAC                                                  |
|         | Rot-13c           | AACAAACATCCCAACAATCCC                                                           |
|         | Rot-14m           | GATTGTTGGGATGTTTGT ATTGCTGTGTAAGTTTAATAGC                                       |
|         | Rot-15cE          | GGAATTCGAAATTCCTTATCAAGGCTTGCG                                                  |
| pJP1492 | Lipoteichoic-1mB  | CGCGGATCCGGCTACAGAATGGAATTAGAAG                                                 |
|         | Lipoteichoic-2c   | CTTTGTAACACTTTCACTAGTGCTAATGGCAATATTG                                           |
|         | Lipoteichoic-3m   | CAATATTGCCATTAGCACTAGTGAAAGTGTTACAAAG                                           |
|         | Lipoteichoic-6c   | CTCCTTTATTATATAAGCTTACCTGAGAAGATTA AAAAGC                                       |
|         | Lipoteichoic-5m   | GCTTTTTAATCTTCTCAGGTAAGCTTATATAATAAAGGAG                                        |
|         | Lipoteichoic-4cE  | CCGGAATTCGAAACTGTAATAAACGTTGTGC                                                 |
| pJP1493 | lipoteichoic-11mB | CGCGGATCCAATTCAATTTATTTTCATTCTTCCC                                              |
|         | lipoteichoic-13c  | CTCCTTTAATATATAAGCTTACCTGAGAAGATTA AAAAGC                                       |
|         | lipoteichoic-12m  | GCTTTTTAATCTTCTCAGGTAAGCTTATATAATAAAGGAG                                        |
|         | Lipoteichoic-4cE  | CCGGAATTCGAAACTGTAATAAACGTTGTGC                                                 |
| pJP1494 | lipoteichoic-11mB | CGCGGATCCAATTCAATTTATTTTCATTCTTCCC                                              |
|         | Lipoteichoic-6c   | CTCCTTTATTATATAAGCTTACCTGAGAAGATTA AAAAGC                                       |
|         | Lipoteichoic-5m   | GCTTTTTAATCTTCTCAGGTAAGCTTATATAATAAAGGAG                                        |
|         | Lipoteichoic-4cE  | CCGGAATTCGAAACTGTAATAAACGTTGTGC                                                 |
| pJP1495 | DltB-1mS          | ACGCGTCCGACCGCTTAATGAAGAACAGTATGG                                               |
|         | DltB-2c           | CTGAGAAGATTA AAAAGCCAACCGTTAATTACCTCTGCAATTT                                    |
|         | DltB-3m           | TTGGCTTTTTAATCTTCTCAGG                                                          |
|         | Lipoteichoic-4cE  | CCGGAATTCGAAACTGTAATAAACGTTGTGC                                                 |
| pJP1496 | Lipoteichoic-1mB  | CGCGGATCCGGCTACAGAATGGAATTAGAAG                                                 |
|         | lipoteichoic-22c  | CCTAACCACTTACTTTGTAACACTTTCACTAGTGCTAATGGCAATATT<br>G                           |
|         | lipoteichoic-21m  | CAATATTGCCATTAGCACTAGTGAAAGTGTTACAAAGTAAATGGTTA<br>GG                           |
|         | lipoteichoic-13c  | CTCCTTTAATATATAAGCTTACCTGAGAAGATTA AAAAGC                                       |
|         | lipoteichoic-12m  | GCTTTTTAATCTTCTCAGGTAAGCTTATATAATAAAGGAG                                        |
|         | Lipoteichoic-4cE  | CCGGAATTCGAAACTGTAATAAACGTTGTGC                                                 |
| pJP1497 | Lipoteichoic-1mB  | CGCGGATCCGGCTACAGAATGGAATTAGAAG                                                 |
|         | lipoteichoic-22c  | CCTAACCACTTACTTTGTAACACTTTCACTAGTGCTAATGGCAATATT<br>G                           |
|         | lipoteichoic-21m  | CAATATTGCCATTAGCACTAGTGAAAGTGTTACAAAGTAAATGGTTA<br>GG                           |
|         | lipoteichoic-20cE | CCGGAATTCCTCGATACCATGCCAAATTCCC                                                 |
| pJP1498 | lipoteichoic-16mB | CGCGGATCCAACGGATGATTCCATATGGTG                                                  |
|         | lipoteichoic-18c  | GTCAAAGAATAAATGTAAGCTGTATGCGTACATATATAACCACAAAT<br>TGACAAAGCCATGGAAGCTAATTGTAA  |
|         | lipoteichoic-17m  | TTACAATTAGACTTCCATGGCTTTGTCAATTTGTGGTTATATATGTAC<br>GCATACAGCTTACATTTATTCTTTGAC |
|         | lipoteichoic-19cE | CCGGAATTCCTTCAAAAATTTCTACGTCTGG                                                 |
| pJP1499 | SplE-1mB          | CGCGGATCCAGCATCATGAATAAACAGAGG                                                  |
|         | SplE-2c           | ATGTGCAATGATATGTGCGCC                                                           |
|         | SplE-3m           | GCGCACATATCATTGCACATTGTTCACTTTGGTGGTAACGG                                       |
|         | SplE-4cE          | CCGGAATTCAGGATTGGGTGAATGTCTAAG                                                  |
| pJP1500 | Lipoteichoic-1mB  | CGCGGATCCGGCTACAGAATGGAATTAGAAG                                                 |
|         | Lipoteichoic-2c   | CTTTGTAACACTTTCACTAGTGCTAATGGCAATATTG                                           |
|         | Lipoteichoic-3m   | CAATATTGCCATTAGCACTAGTGAAAGTGTTACAAAG                                           |
|         | Lipoteichoic-23m  | GCTTTTTAATCTTCTCAGGTCGACTTATACAATAAAGGAG                                        |
|         | Lipoteichoic-24c  | CTCCTTTATTGTATAAGTCGACCTGAGAAGATTA AAAAGC                                       |
|         | Lipoteichoic-4cE  | CCGGAATTCGAAACTGTAATAAACGTTGTGC                                                 |

Sequences recognized by the restriction enzymes used in cloning are underlined.
